# Supplementary material for: The use of 4-Hexylresorcinol as antibiotic adjuvant
Source: PubMed Central journal article supplement (PMC7508414; doi:10.1371/journal.pone.0239147), 2020-09-22
Supplement: pone.0239147.s001.pdf [file pone.0239147.s001.pdf]

**S1 Table. Antibiotics used in the present study.**

| <b>Name</b>   | <b>Chemical group</b>  | <b>Mechanism of action</b>                                                                                                                                                               |
|---------------|------------------------|------------------------------------------------------------------------------------------------------------------------------------------------------------------------------------------|
| Albucid       | Sulfanilamide          | Impairs biosynthesis of tetrahydrofolate, required for purine and pyrimidine synthesis. Active against Gram-positive and Gram-negative bacteria and fungi.                               |
| Ampicillin    | Beta-lactam            | Penicillin analog, affects cell wall synthesis. Active against Gram-positive and Gram-negative bacteria.                                                                                 |
| Azithromycin  | Macrolide              | Suppresses protein synthesis, binding to the 50S ribosome subunit, suppresses peptide translocase at the translation stage. Active against Gram-positive and Gram-negative bacteria.     |
| Capremabol    | Polypeptide            | Inhibitor of bacterial protein synthesis at the ribosome level. Active against Gram-positive bacteria (including mycobacteria).                                                          |
| Ciprofloxacin | Quinolone              | Impairs DNA synthesis by inhibition of DNA gyrase. Active against Gram-positive and Gram-negative bacteria.                                                                              |
| Doxycycline   | Tetracycline           | Polyketide, a tetracycline analog. Affects protein synthesis by impairing aminoacyl-tRNA binding to the ribosomal A site. Active against Gram-positive and Gram-negative bacteria.       |
| Gentamicin    | Aminoglycoside         | Affects protein synthesis by impairing ribosomal 50S subunit function. Active against Gram-positive and Gram-negative bacteria.                                                          |
| Levomycetin   | Nitrophenol derivative | Impairs protein synthesis by blocking peptidyl transferase activity. Binds to 23S rRNA of the 50S ribosome subunit. Active against Gram-positive and Gram-negative bacteria.             |
| Naftifine     | Phenol derivative      | Allylamine antifungal agent. Inhibits squalene epoxidase, which results in suppressed biosynthesis of ergosterol, an essential component of fungal cell membranes. Active against fungi. |
| Polymyxin     | Polypeptide            | Impairs the structure and function of the cytoplasmic membrane. Active against Gram-negative bacteria.                                                                                   |
| Rubomycin     | Polyheterocycle        | Impairs DNA and RNA synthesis. Active against Gram-positive bacteria.                                                                                                                    |
| Tobramycin    | Aminoglycoside         | Affects protein synthesis impairing ribosomal 50S subunit function. Active against Gram-positive and Gram-negative bacteria.                                                             |
| Vancomycin    | Glycopeptide           | Inhibits cell wall biosynthesis, changes cell membrane permeability, affects RNA synthesis. Active against Gram-positive bacteria (except mycobacteria).                                 |
