# Supplementary material for: The use of 4-Hexylresorcinol as antibiotic adjuvant
Source: PubMed Central journal article supplement (PMC7508414; doi:10.1371/journal.pone.0239147), 2020-09-22
Supplement: pone.0239147.s002.pdf [file pone.0239147.s002.pdf]

S2 Table. Interactions between 4-HR and various groups of antibiotics against clinical isolates of pathogenic gram negative bacteria.

| Pathogen             | Phenotype | Antibiotic             | K1   | FICI  |
|----------------------|-----------|------------------------|------|-------|
| <i>A. baumannii</i>  | Sensitive | Amikacin               | 8    | 0.37  |
|                      | Sensitive | Cefoperazone/Sulbactam | 8    | 0.25  |
|                      | Sensitive | Ciprofloxacin          | 4    | 0.5   |
|                      | Sensitive | Meropenem              | 8    | 0.37  |
|                      | Sensitive | Polymyxin              | 16   | 0.125 |
|                      | Sensitive | Tigecycline            | 8    | 0.135 |
| <i>E.coli</i>        | Sensitive | Amikacin               | 4    | 2.25  |
|                      | Sensitive | Ampicillin             | 0.13 | 9     |
|                      | Sensitive | Cefotaxim              | 2    | 1.5   |
|                      | Sensitive | Ciprofloxacin          | 16   | 0.12  |
|                      | Sensitive | Meropenem              | 2    | 2.5   |
|                      | Sensitive | Polymyxin              | 1    | 1.25  |
| <i>P. aeruginosa</i> | Sensitive | Tigecycline            | 2    | 2.5   |
|                      | Sensitive | Amikacin               | 8    | 1.125 |
|                      | Sensitive | Ceftazidim             | 4    | 2.25  |
|                      | Sensitive | Ciprofloxacin          | 4    | 1.25  |
|                      | Sensitive | Meropenem              | 4    | 1.24  |
|                      | Sensitive | Polymyxin              | 16   | 0.09  |
| <i>A. baumannii</i>  | Resistant | Amikacin               | 1    | 1.5   |
|                      | Resistant | Cefoperazone/Sulbactam | 4    | 0.75  |
|                      | Resistant | Ciprofloxacin          | 1    | 1.5   |
|                      | Resistant | Meropenem              | 4    | 0.75  |
|                      | Resistant | Polymyxin              | 13   | 0.03  |
|                      | Resistant | Tigecycline            | 16   | 0.125 |
| <i>E.coli</i>        | Resistant | Amikacin               | 1    | 2.5   |
|                      | Resistant | Ampicillin             | 0.03 | 32.5  |
|                      | Resistant | Cefotaxim              | 8    | 0.625 |
|                      | Resistant | Ciprofloxacin          | 4    | 0.75  |
|                      | Resistant | Meropenem              | 1    | 3     |
|                      | Resistant | Polymyxin              | 4    | 0.75  |
| <i>P. aeruginosa</i> | Resistant | Amikacin               | 2    | 2.5   |
|                      | Resistant | Ceftazidim             | 16   | 0.09  |
|                      | Resistant | Ciprofloxacin          | 512  | 0.017 |
|                      | Resistant | Meropenem              | 2    | 1.5   |
|                      | Resistant | Polymyxin              | 8    | 0.09  |
