# Supplementary material for: The use of 4-Hexylresorcinol as antibiotic adjuvant
Source: PubMed Central journal article supplement (PMC7508414; doi:10.1371/journal.pone.0239147), 2020-09-22
Supplement: pone.0239147.s003.pdf [file pone.0239147.s003.pdf]

**S3 Table. Actual numbers of *K. pneumoniae* KPM9 cells in organs (cells/mL) from euthanized mice.** Organs were analyzed 14 days after inoculation and treatment with the indicated doses of Polymixin B (PmB) and 4-HR for 5 days. For each organ, the range of bacterial counts in contaminated surviving animals (cells/mL) is indicated. Numbers in parenthesis: number of contaminated surviving animals / number of total surviving animals. Total number of animals was 10 per group. A ratio of 1/8 would thus describe a situation where 8 out of 10 mice did survive. From these 8 surviving animals, the respective organ of only one animal was still contaminated.

| <b>Treatment</b>            | <b>Blood</b> | <b>Spleen</b>  | <b>Lung</b>       |
|-----------------------------|--------------|----------------|-------------------|
| 1 mg/kg PmB + 30 mg/kg 4-HR | 0 (0/8)      | 320 (1/8)      | 460-620 (2/8)     |
| 1 mg/kg PmB + 50 mg/kg 4-HR | 80-220 (2/6) | 290-3200 (2/6) | 17000-53000 (2/6) |
| 1 mg/kg PmB + 75 mg/kg 4-HR | 0 (0/6)      | 10 (1/6)       | 50-290 (3/6)      |
| 1 mg/kg PmB                 | 40 (1/4)     | 20-190 (2/4)   | 70-2100 (2/4)     |
| 50 mg/kg 4-HR               | 0 (0/4)      | 50 (1/4)       | 10 (1/4)          |
